# Supplementary material for: EPR as a probe of the intracellular speciation of ruthenium(iii) anticancer compounds
Source: Royal Society of Chemistry journal article supplement (doi:10.1039/c3mt00090g), 2013-01-01
Supplement: c3mt00090g.pdf [file c3mt00090g.pdf]

# **EPR as a probe of the intracellular speciation of ruthenium(III) anticancer compounds**

Michael I. Webb, Charles J. Walsby

## **Supplementary Material**

---

### **Table of contents:**

- **Table S1:** g values and line widths used in EPR simulations of Ru(III) species.
- **Figures S1 and S2:** Deconvolution of EPR spectra from NAMI-A in buffer after incubation with yeast cells.
- **Figures S3 and S4:** Deconvolution of EPR spectra from KP1019 in buffer after incubation with yeast cells.
- **Figures S5 and S6:** Deconvolution of EPR spectra from NAMI-A and KP1019 in buffer after incubation with yeast cell walls.
- **Figures S7 and S8:** Deconvolution of EPR spectra from NAMI-A and KP1019 in buffer after incubation with yeast mitochondria.
- **Figures S9 and S10:** Deconvolution of EPR spectra from NAMI-A and KP1019 in buffer after incubation with yeast nuclear fraction.
- **Figures S11 and S12:** Deconvolution of EPR spectra from NAMI-A and KP1019 in buffer after incubation with yeast cytoplasmic protein fraction
- **Figures S13 and S14:** Concentration calibration curve for NAMI-A.
- **Figures S15 and S16:** Concentration calibration curve for KP1019.
- **Figures S17 and S18:** EPR spectra of NAMI-A and KP1019 with yeast cells at 4 °C.

**Table S1** g values and line widths used in EPR simulations of Ru(III) species interaction with *Saccharomyces cerevisiae* whole cells and cell components.

| Species                   | $g_1$ | $g_2$ | $g_3$ | $L_1$ | $L_2$ | $L_3$ |
|---------------------------|-------|-------|-------|-------|-------|-------|
| <b><u>NAMI-A</u></b>      |       |       |       |       |       |       |
| NAMI-A                    | 2.47  | 2.47  | 1.72  | 105   | 105   | 180   |
| NAMI-A-H <sub>2</sub> O   | 2.32  | 2.32  | 1.87  | 75    | 75    | 60    |
| NAMI-A-Cell-Wall-1        | 2.45  | 2.21  | 1.10  | 300   | 80    | 200   |
| NAMI-A-Cell-Wall-2        | 2.38  | 2.18  | 1.80  | 325   | 250   | 350   |
| NAMI-A-Mitochondria-1     | 2.40  | 2.21  | 1.10  | 400   | 70    | 200   |
| NAMI-A-Mitochondria-2     | 2.40  | 2.22  | 1.75  | 200   | 175   | 350   |
| NAMI-A-Cyto.-Proteins-1   | 2.42  | 2.25  | 1.84  | 200   | 175   | 350   |
| NAMI-A-Cyto.-Proteins-2   | 2.20  | 2.10  | 1.84  | 200   | 150   | 250   |
| NAMI-A-Nuclear-Fraction-1 | 2.40  | 2.22  | 1.10  | 400   | 100   | 200   |
| NAMI-A-Nuclear-Fraction-2 | 2.48  | 2.30  | 1.88  | 250   | 150   | 350   |
| <b><u>KP1019</u></b>      |       |       |       |       |       |       |
| KP1019-Axial              | 2.64  | 2.64  | 1.20  | 120   | 120   | 500   |
| KP1019-Rhombic            | 2.94  | 2.31  | 0.95  | 100   | 200   | 600   |
| KP1019-Whole-Cells-1      | 2.40  | 2.18  | 1.10  | 400   | 80    | 500   |
| KP1019-Cell-Wall-1        | 2.50  | 2.30  | 1.80  | 300   | 200   | 250   |
| KP1019-Cell-Wall-2        | 2.40  | 2.20  | 1.88  | 250   | 100   | 350   |
| KP1019-Mitochondria-1     | 2.36  | 2.19  | 1.84  | 175   | 85    | 250   |
| KP1019-Mitochondria-2     | 2.40  | 2.20  | 1.80  | 275   | 225   | 350   |
| KP1019-Cyto.-Proteins-1   | 2.35  | 2.25  | 1.88  | 300   | 250   | 300   |
| KP1019-Cyto.-Proteins-2   | 2.20  | 2.10  | 1.80  | 250   | 200   | 250   |
| KP1019-Nuclear-Fraction-1 | 2.41  | 2.20  | 1.80  | 100   | 150   | 250   |
| KP1019-Nuclear-Fraction-2 | 2.40  | 2.20  | 1.84  | 250   | 150   | 350   |

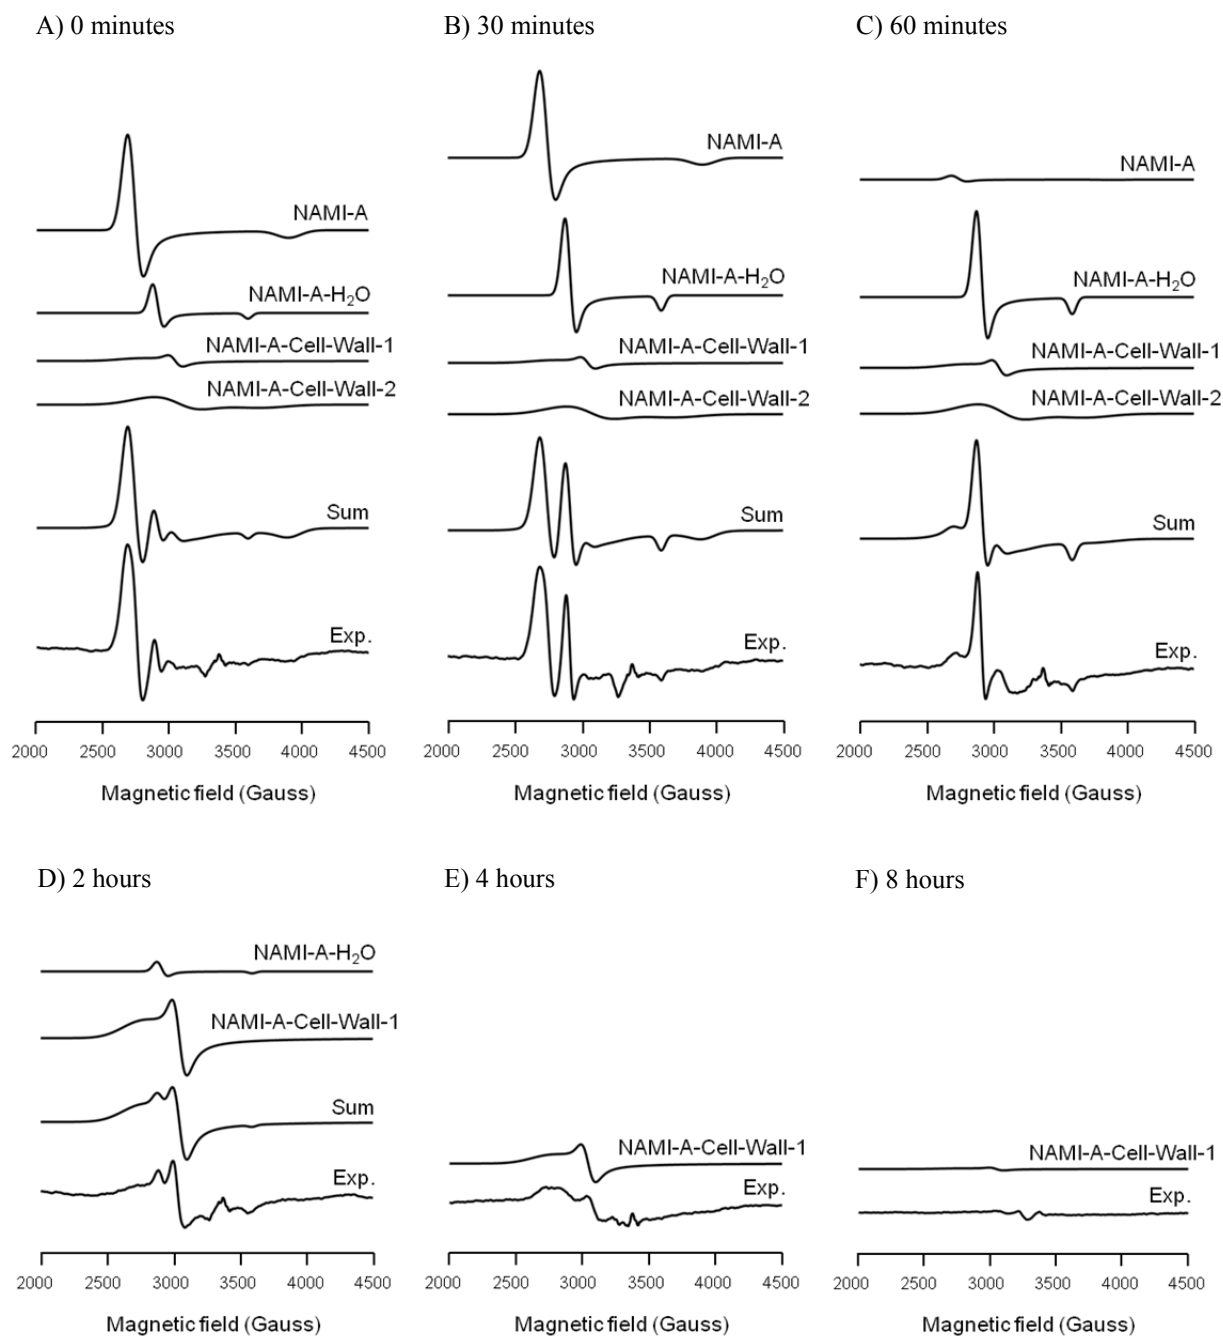

**Figure S1** Deconvolution of EPR spectra from NAMI-A in buffer after incubation with yeast cells for 0 minutes, 30 minutes, 1, 2, 4, and 8 hours at 30 °C.

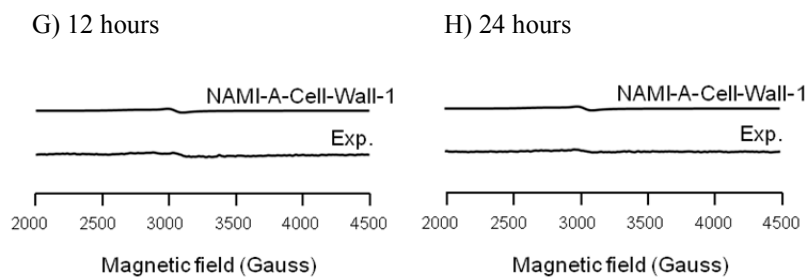

**Figure S2** Deconvolution of EPR spectra from NAMI-A in buffer after incubation with yeast cells for 12 and 24 hours at 30 °C.

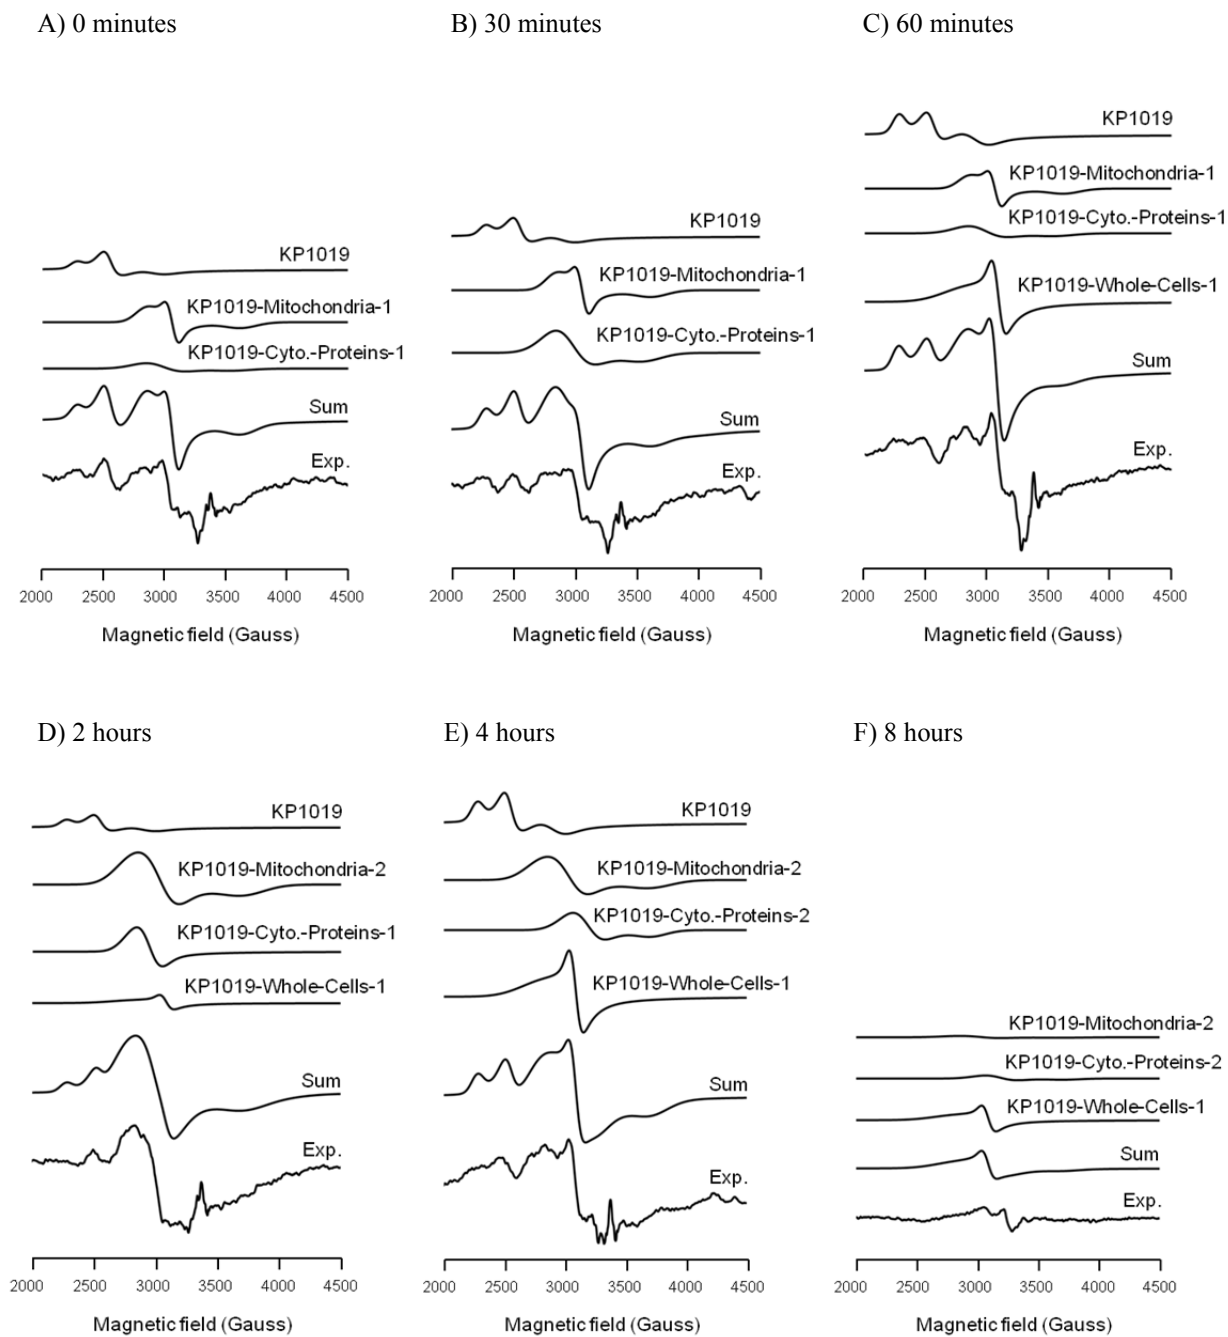

**Figure S3** Deconvolution of EPR spectra from KP1019 in PBS after incubation with yeast cells for 0 minutes, 30 minutes, 1, 2, 4, and 8 hours at 30 °C.

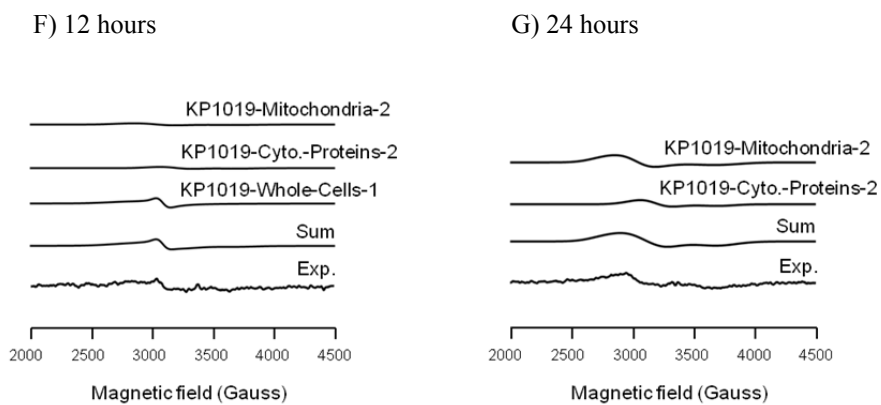

**Figure S4** Deconvolution of EPR spectra from KP1019 in PBS after incubation with yeast cells for 12 and 24 hours at 30 °C.

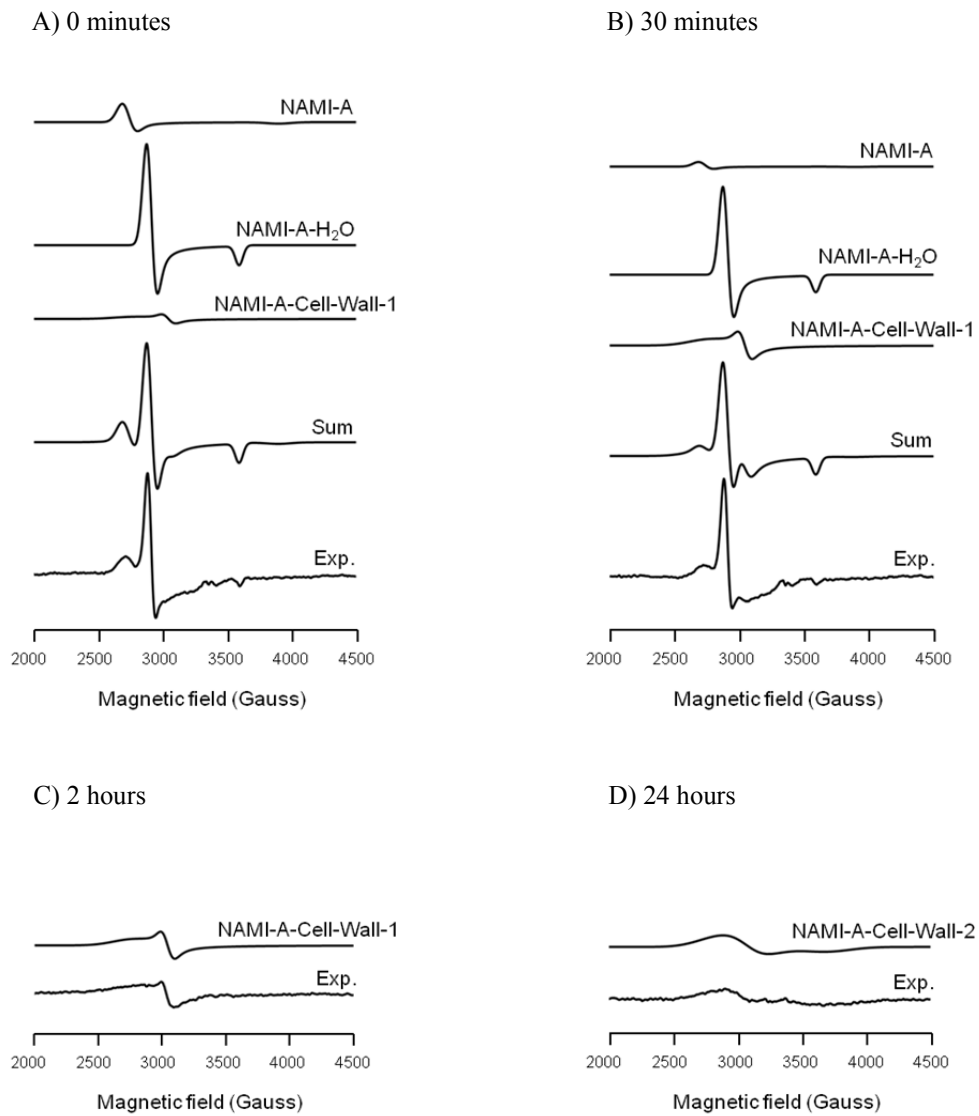

**Figure S5** Deconvolution of EPR spectra from NAMI-A in PBS after incubation with yeast cell walls for 0 minutes, 30 minutes, 2, and 24 hours at 30 °C.

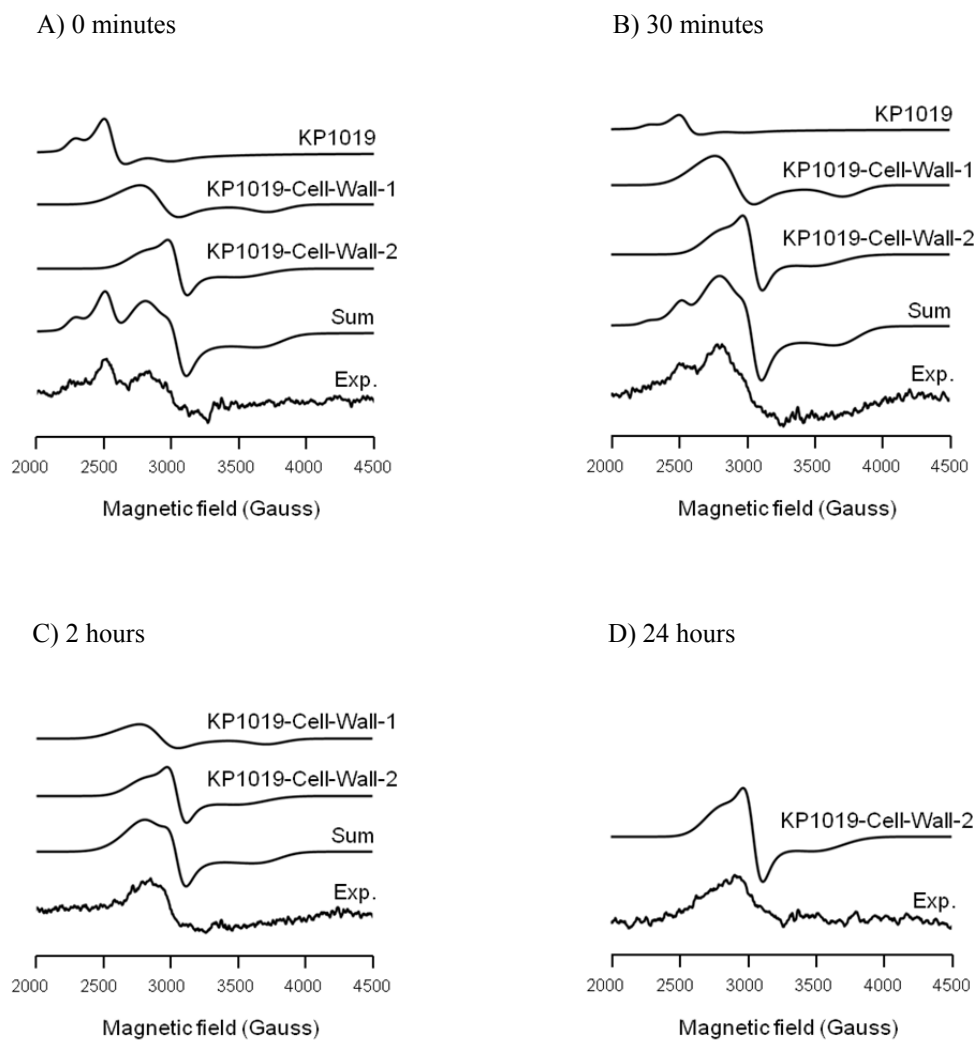

**Figure S6** Deconvolution of EPR spectra from KP1019 in PBS after incubation with yeast cell walls for 0 minutes, 30 minutes, 2, and 24 hours at 30 °C.



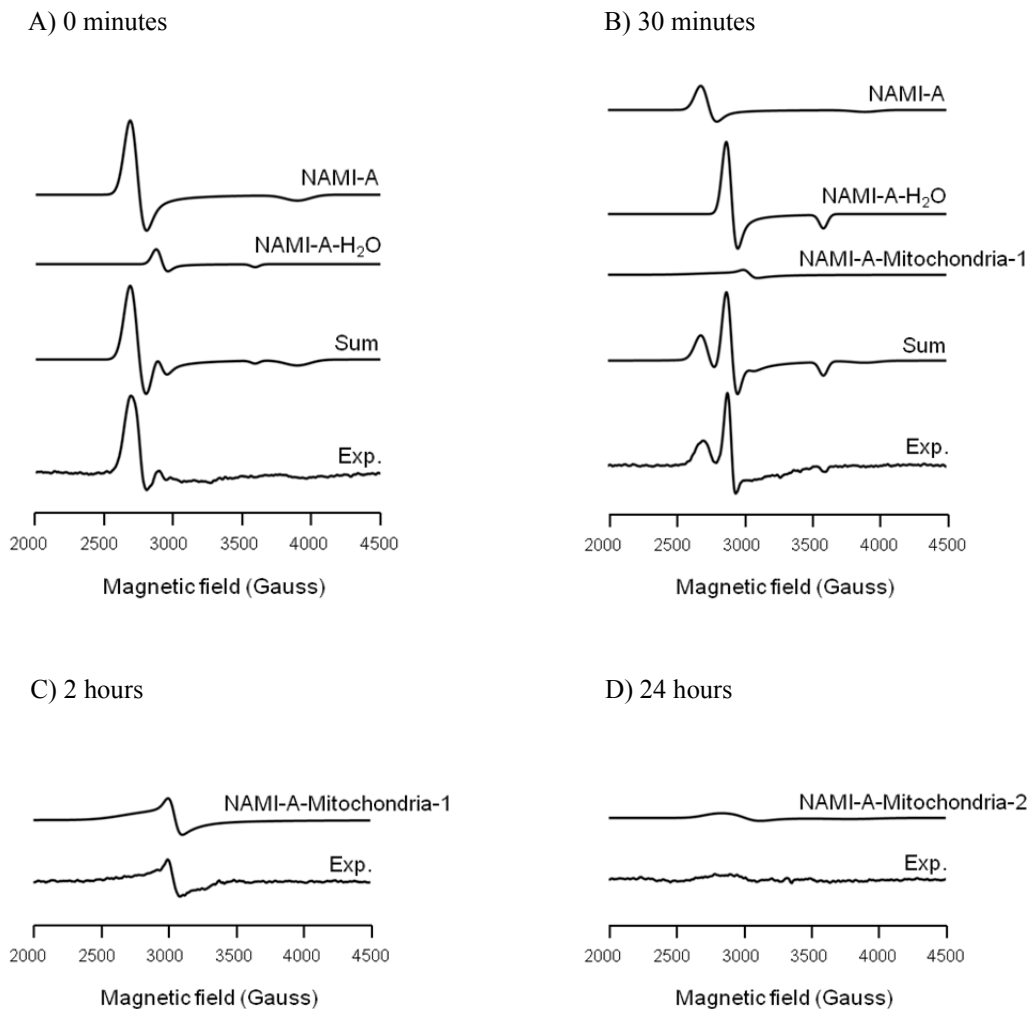

**Figure S7** Deconvolution of EPR spectra from NAMI-A in PBS after incubation with yeast cell mitochondria for 0 minutes, 30 minutes, 2, and 24 hours at 30 °C.

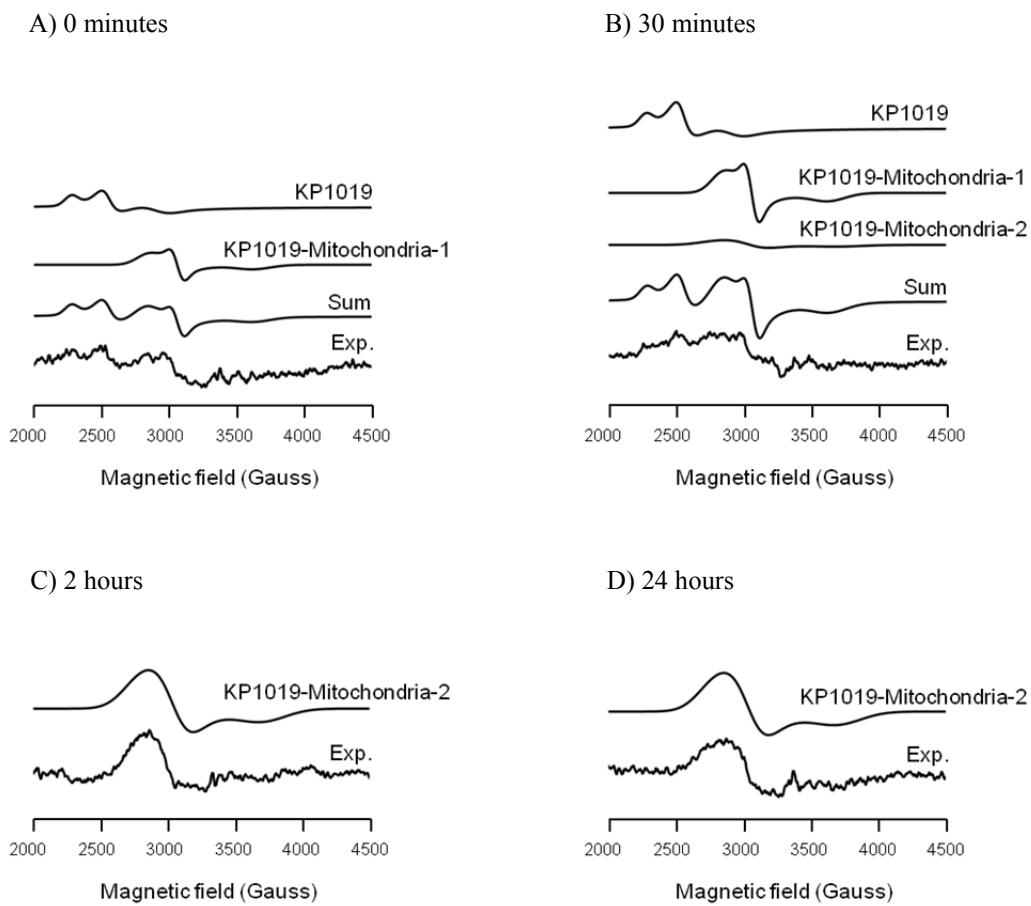

**Figure S8** Deconvolution of EPR spectra from KP1019 in PBS after incubation with yeast cell mitochondria for 0 minutes, 30 minutes, 2, and 24 hours at 30 °C.

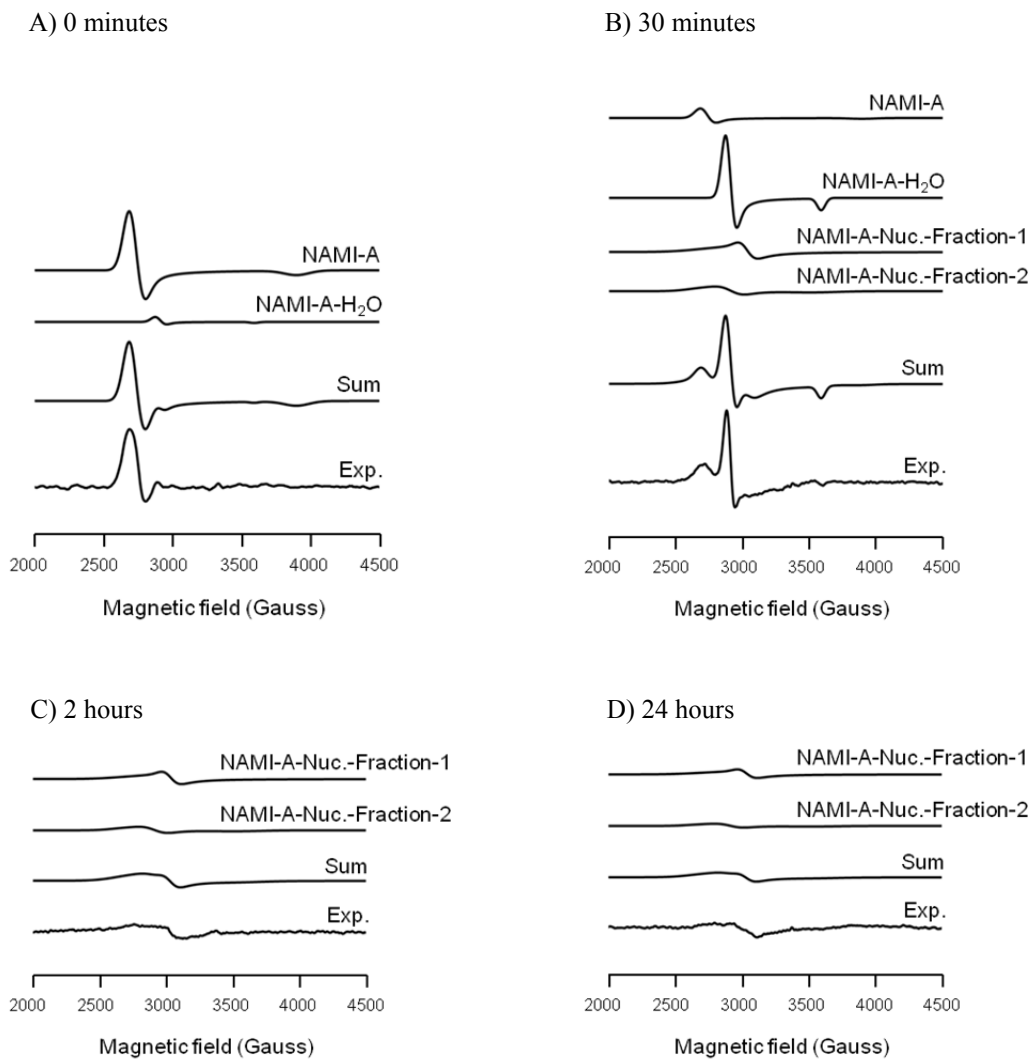

**Figure S9** Deconvolution of EPR spectra from NAMI-A in PBS after incubation with yeast cell nuclear fraction for 0 minutes, 30 minutes, 2, and 24 hours at 30 °C.

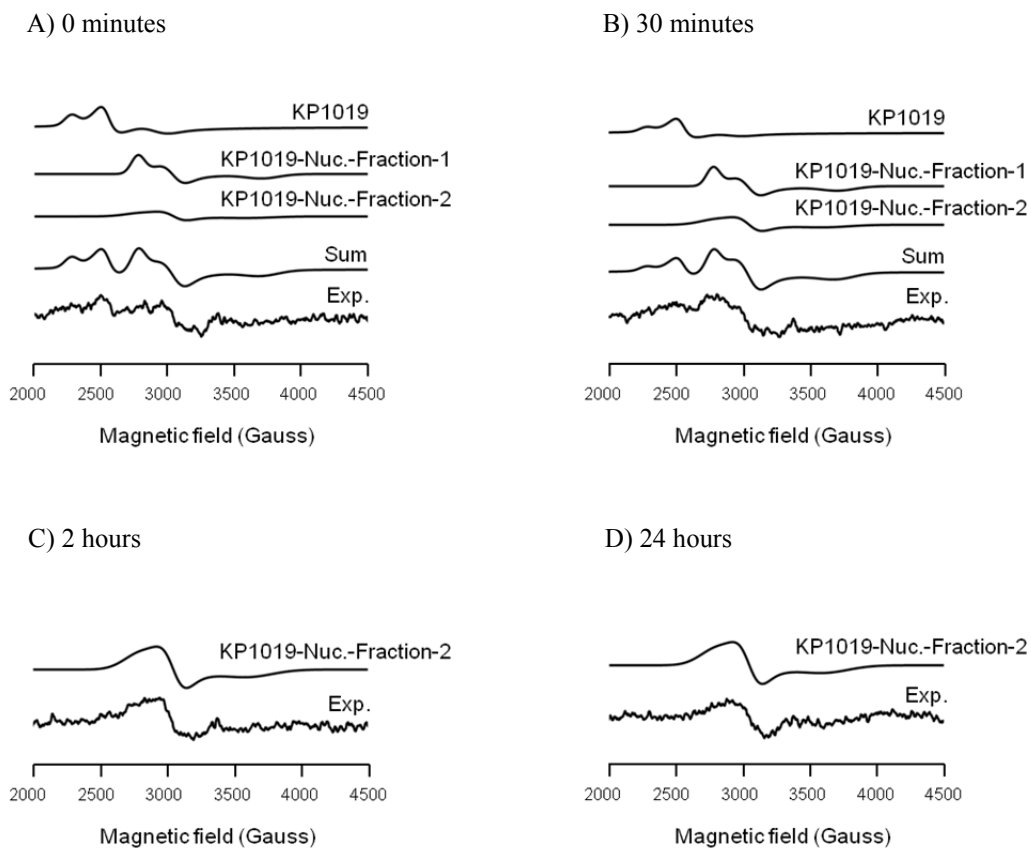

**Figure S10** Deconvolution of EPR spectra from KP1019 in PBS after incubation with yeast cell nuclear fraction for 0 minutes, 30 minutes, 2, and 24 hours at 30 °C.

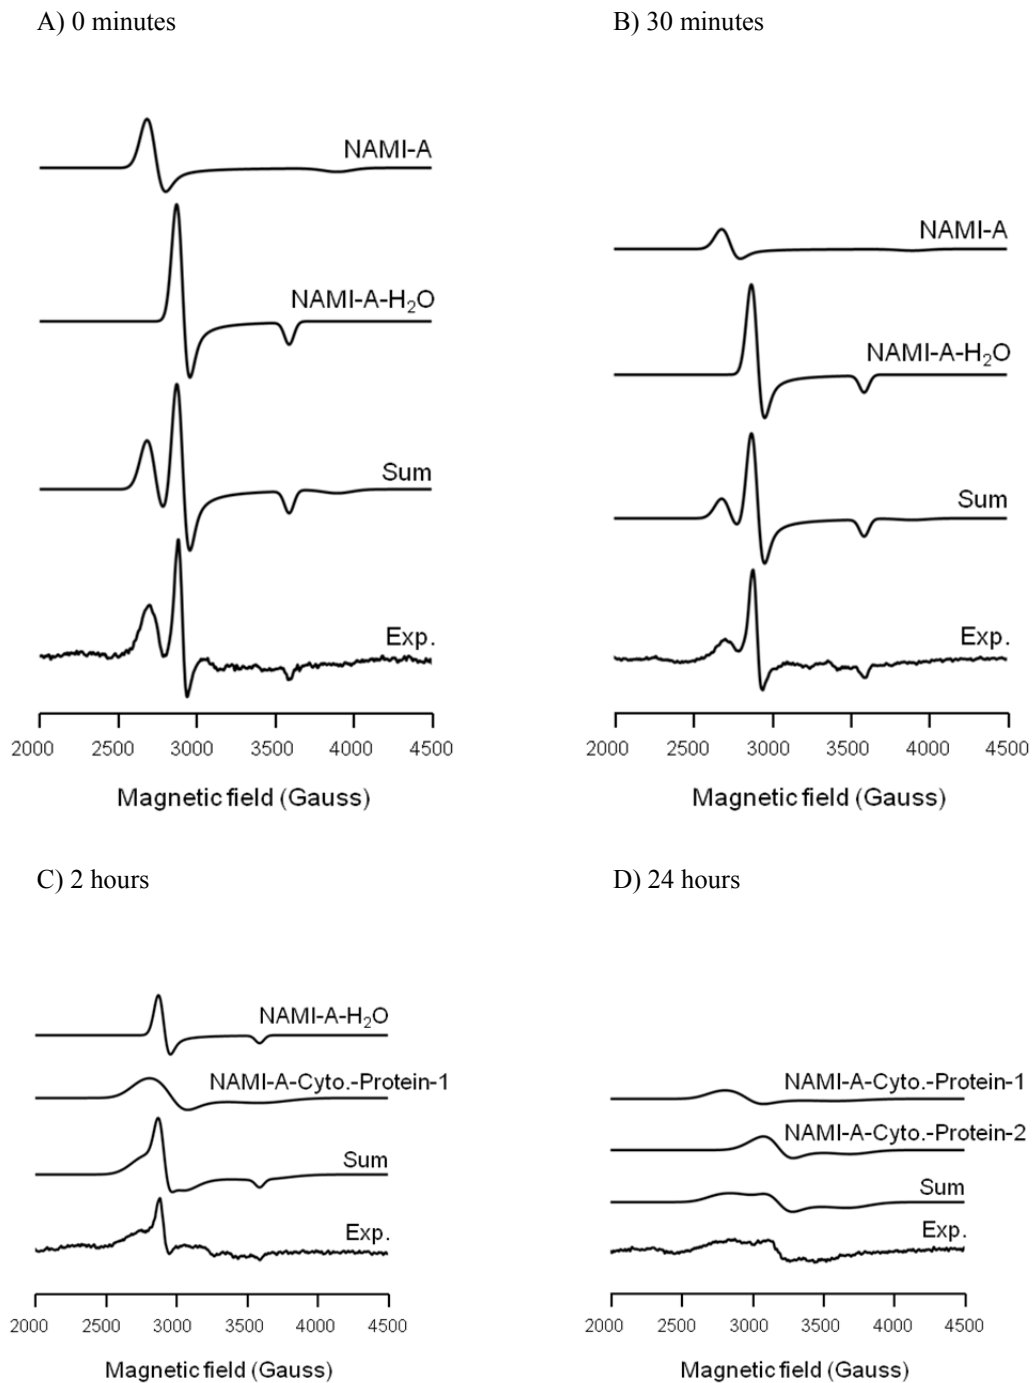

**Figure S11** Deconvolution of EPR spectra from NAMI-A in PBS after incubation with yeast cell cytoplasmic protein fraction for 0 minutes, 30 minutes, 2, and 24 hours at 30 °C.

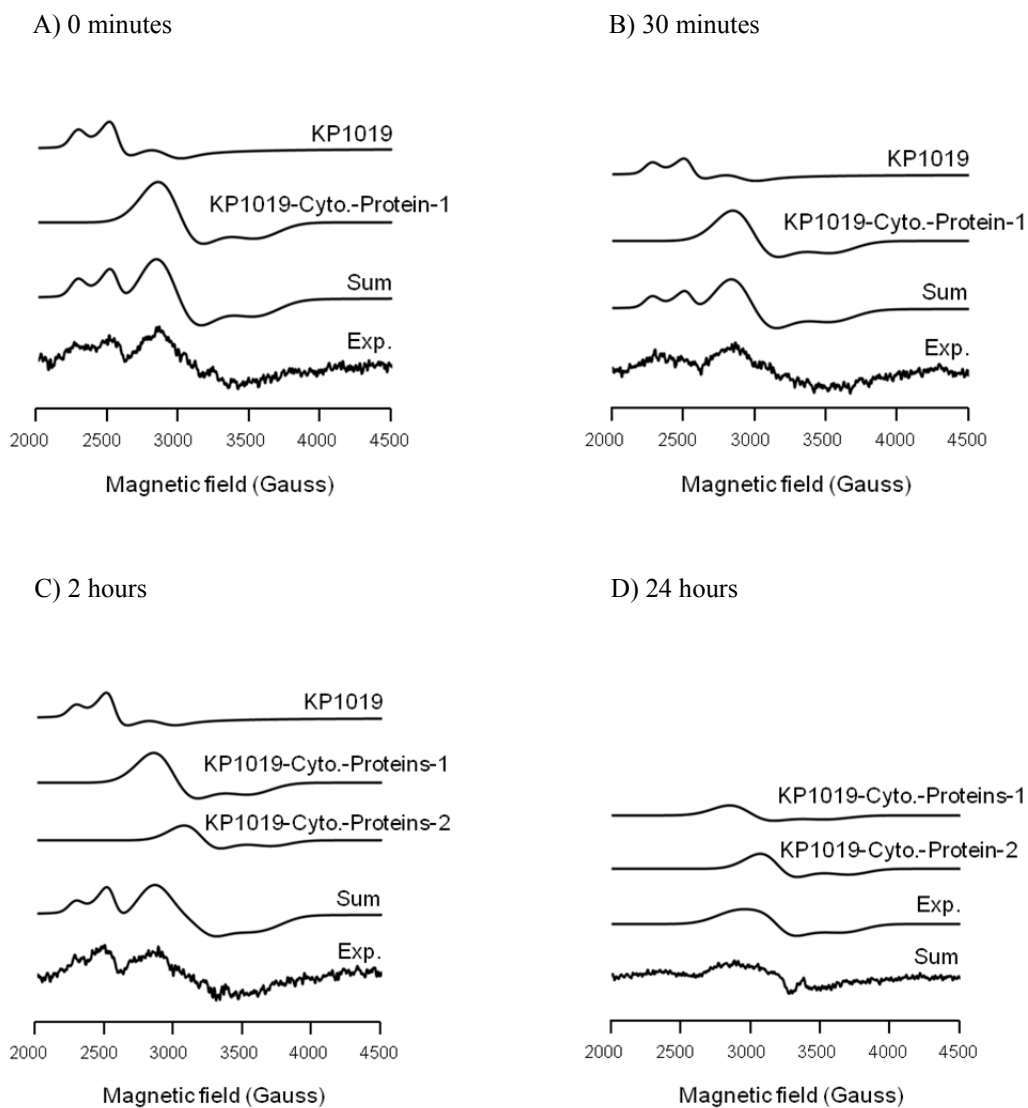

**Figure S12** Deconvolution of EPR spectra from KP1019 in PBS after incubation with yeast cell cytoplasmic protein fraction for 0 minutes, 30 minutes, 2, and 24 hours at 30 °C.

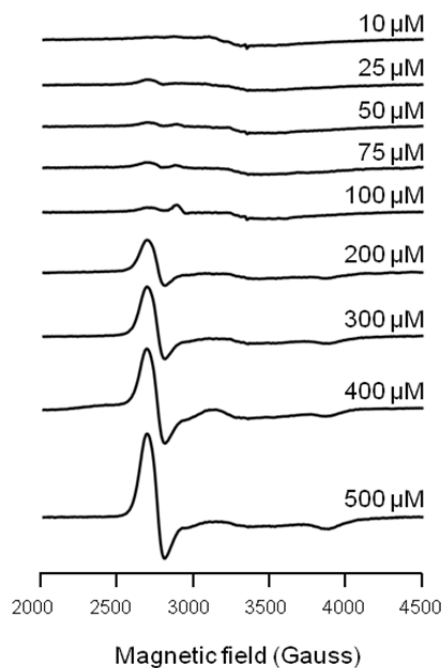

**Figure S13** Serial dilution of NAMI-A in PBS to determine the calibration curve.

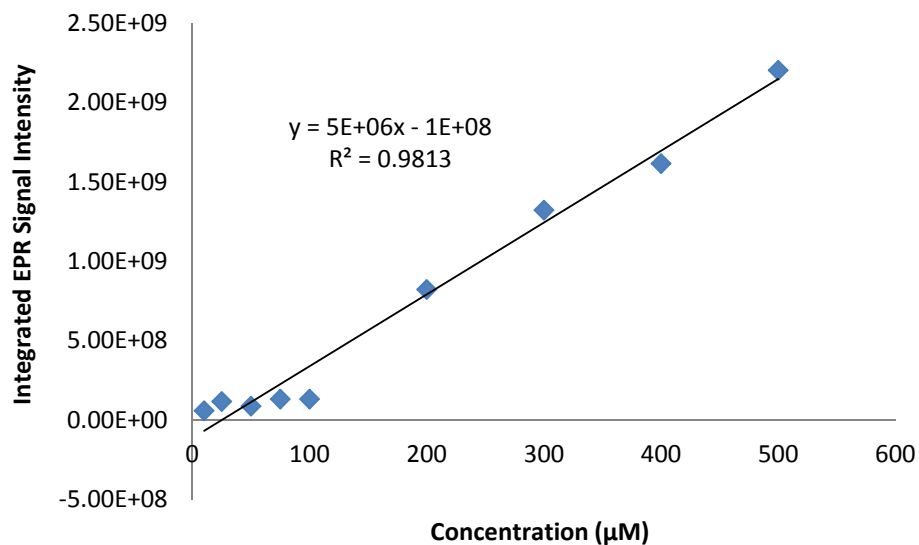

**Figure S14** Plot of the integrated signal intensities determined by the titration of NAMI-A in PBS to determine the detection limit of the EPR spectrometer.

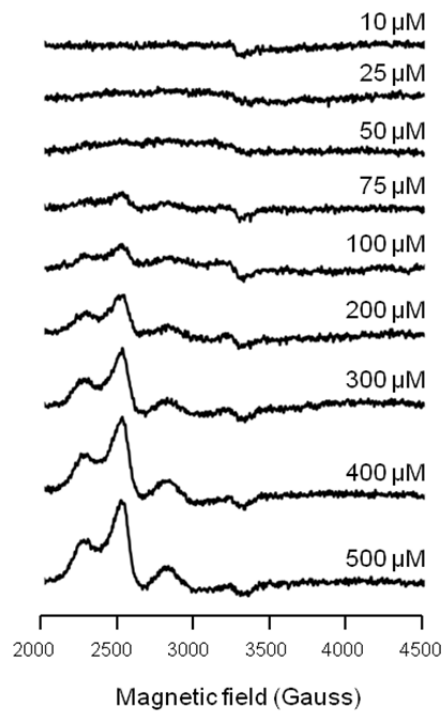

**Figure S15** Serial dilution of KP1019 in PBS to determine the detection calibration curve.

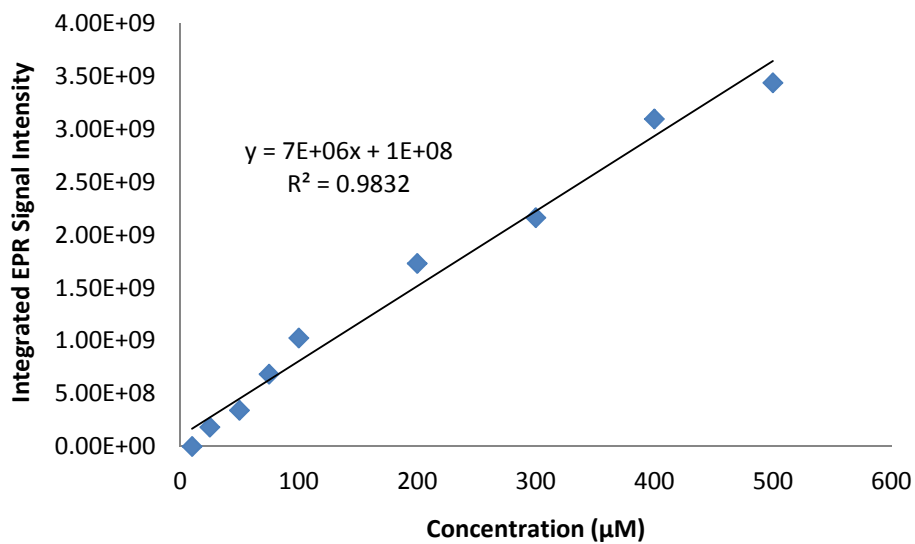

**Figure S16** Plot of the integrated signal intensities determined by the titration of KP1019 in PBS to determine the detection limit of the EPR spectrometer.



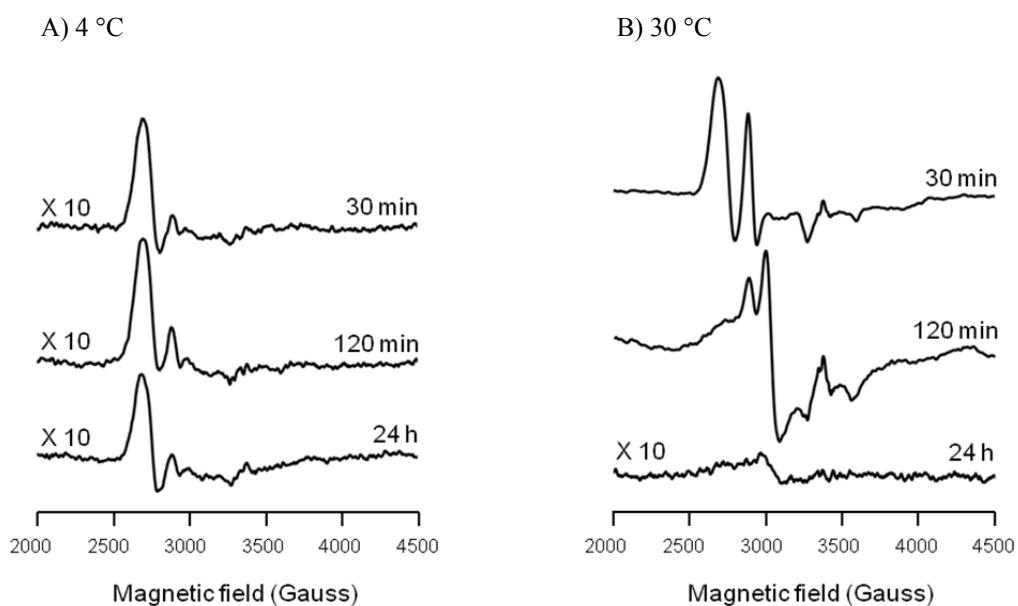

**Figure S17** EPR spectra of NAMI-A in PBS after incubation with whole yeast cells for 30 minutes, 2, and 24 hours at 4 and 30 °C.

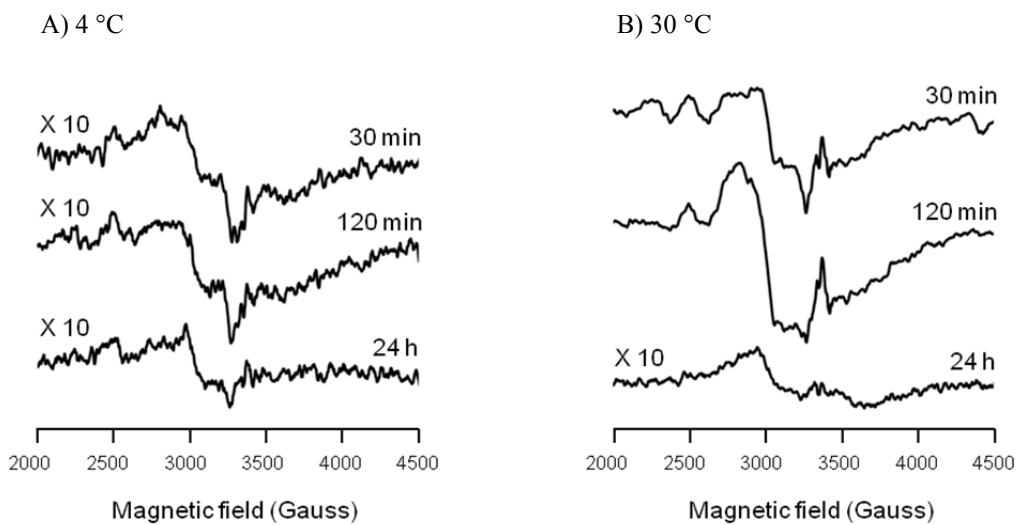

**Figure S18** EPR spectra of KP1019 in PBS after incubation with whole yeast cells for 30 minutes, 2, and 24 hours at 4 and 30 °C.
